# Supplementary material for: Cellular senescence induced by S100A9 in mesenchymal stromal cells through NLRP3 inflammasome activation
Source: PubMed Central journal article supplement (PMC6874461; doi:10.18632/aging.102409), 2019-11-14
Supplement: aging-11-102409-s002.pdf [file aging-11-102409-s002.pdf]

**Supplementary Table 2. Primer sets for qPCR.**

| <b>Name</b>     | <b>Primer Sequence (5' to 3')</b> |
|-----------------|-----------------------------------|
| NLRP3-F         | CAATGGGGAGGAGAAGGCGT              |
| NLRP3-R         | TCTGAACCCCACTTCGGCTC              |
| Caspase1-F      | TGAGCAGCCAGATGGTAGAGC             |
| Caspase1-R      | TCACTTCCTGCCCACAGACAT             |
| IL-1 $\beta$ -F | CTCTTCGAGGCACAAGGCAC              |
| IL-1 $\beta$ -R | CAAGTCATCCTCATTGCCACTGT           |
| IL-6-F          | ACTCACCTCTTCAGAACGAATTG           |
| IL-6-R          | CCATCTTTGGAAGGTTTCAGGTTG          |
| IL-8-F          | TTTTGCCAAGGAGTGCTAAAGA            |
| IL-8-R          | AACCCCTCTGCACCCAGTTTTTC           |
| TGF $\beta$ -F  | GGCCAGATCCTGTCCAAGC               |
| TGF $\beta$ -R  | GTGGGTTTCCACCATTAGCAC             |
| P53-F           | CAGCACATGACGGAGGTTGT              |
| P53-R           | TCATCCAATACTCCACACGC              |
| P21-F           | TGTCCGTCAGAACCCATGC               |
| P21-R           | AAAGTCGAAGTTCCATCGCTC             |
| P16-F           | GATCCAGGTGGGTAGAAGGTC             |
| P16-R           | CCCCTGCAAACCTTCGTCCT              |
| S100A9-F        | TGGCTCCTCGGCTTTGACAGAGT           |
| S100A9-R        | TGGGTGCCCCAGCTTCACAGA             |
| TLR4-F          | TGCGTGAGACCAGAAAGC                |
| TLR4-R          | TTAAAGCTCAGGTCCAGGTTC             |
| GAPDH-F         | GCACCGTCAAGGCTGAGAAC              |
| GAPDH-R         | GTGGTGAAGACGCCAGTGGA              |
