# Supplementary material for: Cellular senescence induced by S100A9 in mesenchymal stromal cells through NLRP3 inflammasome activation
Source: PubMed Central journal article supplement (PMC6874461; doi:10.18632/aging.102409), 2019-11-14
Supplement: aging-11-102409-s004.pdf [file aging-11-102409-s004.pdf]

## SUPPLEMENTARY FIGURE

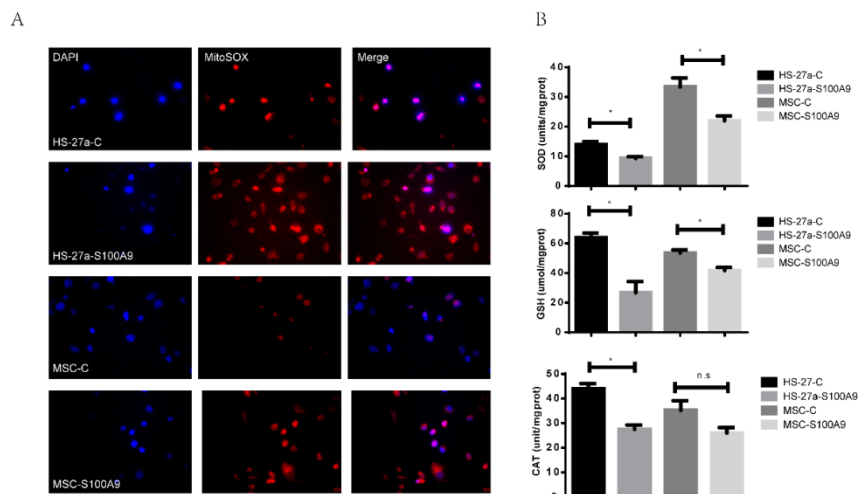

**Supplementary Figure 1. Increased mitochondrial ROS and reduced anti-oxidant enzymes levels in S100A9-induced HS-27a and primary MSC cells.** cells were treated with rhS100A9 for 72h, mitochondrial ROS (A) was measured with fluorescence microscope (DAPI, blue; MitoSOX, red); and superoxide dismutase (SOD), glutathione (GSH), and catalase (CAT) levels (B) were tested.
